# Supplementary material for: Gastroprokinetic agent, mosapride inhibits 5-HT3 receptor currents in NCB-20 cells
Source: PubMed Central journal article supplement — Korean J Physiol Pharmacol. 2019 Aug 26;23(5):419–26. doi: 10.4196/kjpp.2019.23.5.419 (PMC6717790; doi:10.4196/kjpp.2019.23.5.419), 2019-08-26
Supplement: kjpp-23-419-s001.pdf [file kjpp-23-419-s001.pdf]

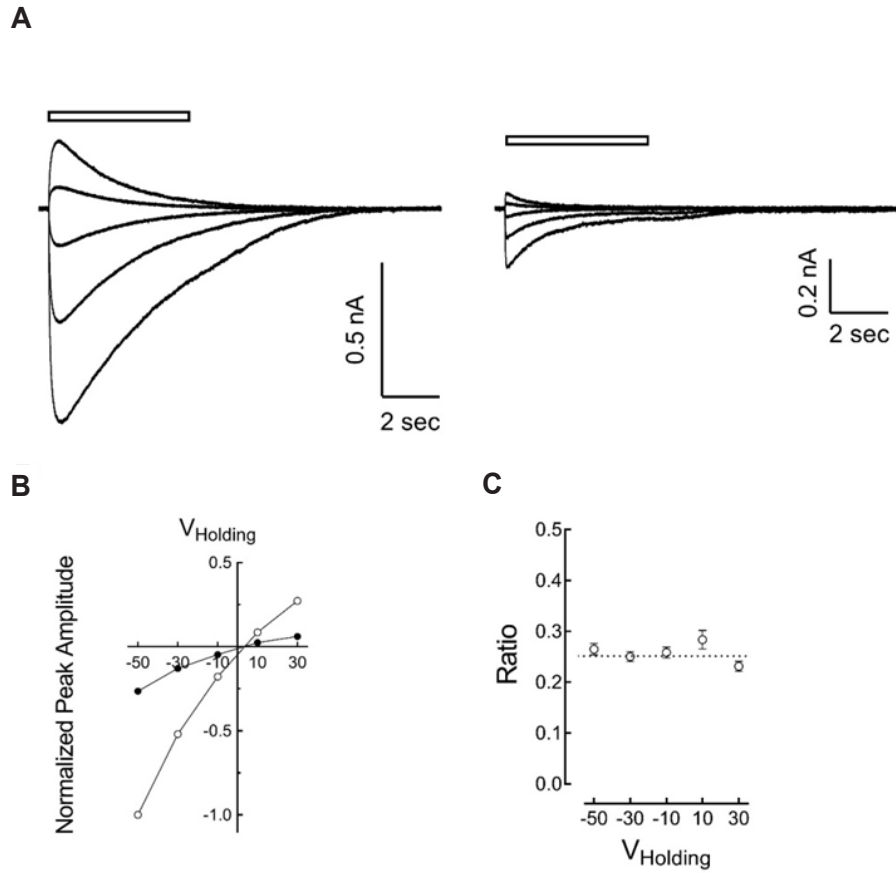

**Supplementary Fig. 1. Current-voltage (I-V) relationship of mosapride on 5-hydroxytryptamine (5-HT)<sub>3</sub> receptor current inhibition.** (A) Representative traces of 5-HT<sub>3</sub> receptor currents induced by 3 μM 5-HT alone at holding potentials of -50 to +30 mV (*left*) and 5-HT<sub>3</sub> receptor currents induced by the co-application of 3 μM 5-HT with 10 μM mosapride at the same holding potentials (*right*). The open horizontal bars indicate the drug application period. (B) I-V plots of averaged normalized peak amplitudes induced by 5-HT with (●) or without (○) mosapride. The reversal potentials were  $7.05 \pm 0.37$  mV ( $n = 11$ ) for 5-HT alone, and  $7.75 \pm 0.53$  mV ( $n = 11$ ) for 5-HT with mosapride. The reversal potential was not significantly changed by co-application of mosapride ( $p = 0.2964$ , unpaired t-test). (C) Fractional block of mosapride (ratio of peak amplitude of 5-HT with mosapride / peak amplitude of 5-HT alone) as a function of the holding potentials ( $V_{\text{Holding}}$ ). The data are expressed as means  $\pm$  standard error of the mean.
