# Supplementary material for: Gastroprokinetic agent, mosapride inhibits 5-HT3 receptor currents in NCB-20 cells
Source: PubMed Central journal article supplement — Korean J Physiol Pharmacol. 2019 Aug 26;23(5):419–26. doi: 10.4196/kjpp.2019.23.5.419 (PMC6717790; doi:10.4196/kjpp.2019.23.5.419), 2019-08-26
Supplement: kjpp-23-419-s002.pdf [file kjpp-23-419-s002.pdf]

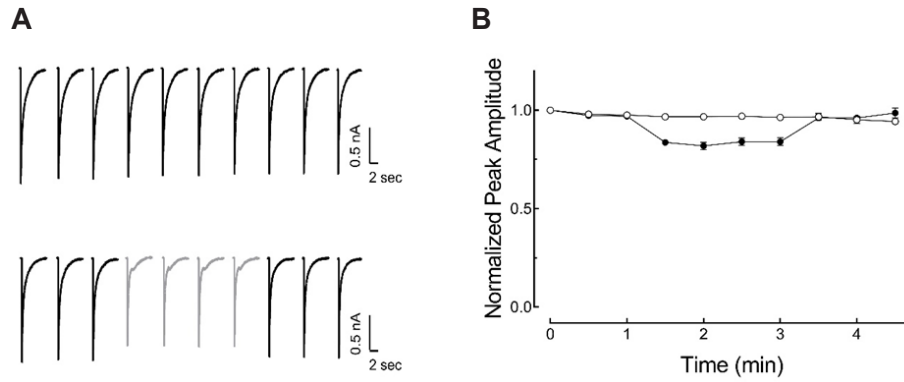

**Supplementary Fig. 2. Use-dependency of mosapride inhibition on the 5-hydroxytryptamine (5-HT)<sub>3</sub> receptor current.** (A) Representative traces of 5-HT<sub>3</sub> receptor currents induced by 10 μM 5-HT alone (*upper*), and currents induced by the co-application of 10 μM 5-HT with 10 μM mosapride (*lower*), for 2 sec at 30 sec interval, 10 times. Mosapride co-application was started at the fourth trace and stopped at the seventh trace, indicated by gray color traces. (B) Averaged plots of normalized peak amplitudes induced by 5-HT with (●) or without (○) mosapride versus the time. The ratio of the peak amplitudes of seventh trace (the last mosapride application) to the fourth peak amplitude (the first of mosapride application) was compared to analyze the use-dependency drug effects. There was no significant difference in the ratio between the application of 5-HT alone ( $n = 9$ ,  $1.01 \pm 0.01$ ) and the co-application of 5-HT and mosapride ( $n = 9$ ,  $0.99 \pm 0.02$ ) ( $p = 0.7341$ , unpaired t-test). The data are expressed as means  $\pm$  standard error of the mean.
